# Supplementary material for: Hybrid 1D/2D nanocarbon-based conducting polymer nanocomposites for high-performance wearable electrodes
Source: Royal Society of Chemistry journal article supplement (doi:10.1039/d2na00220e), 2022-01-01
Supplement: d2na00220e2.pdf [file d2na00220e2.pdf]

## Supplementary Information

# Hybrid 1D/2D nanocarbon-based conducting polymer nanocomposites for high-performance wearable electrodes

Dong Young Kim,<sup>\*a †</sup> Geonhee Lee,<sup>b †</sup> Gil Yong Lee,<sup>b</sup> Jungpil Kim,<sup>c</sup> Kwangu Jeon<sup>d</sup>, and  
Keun Soo Kim<sup>\*b</sup>

<sup>a</sup> Convergence Research Division, Korea Carbon Industry Promotion Agency (KCARBON),  
111, Biseongnal-ro, Deokjin-gu, Jeonju-si, 54852 Korea.

<sup>b</sup> Department of Physics, Graphene Research Institute, and GRI-TPC International Research  
Centre, Sejong University, Seoul 05006, Republic of Korea.

<sup>c</sup> Carbon Materials Application Research Group, Korea Institute of Industrial Technology  
(KITECH), 222 Palbok-ro, Deokjin-gu, Jeonju 54853, Republic of Korea

<sup>d</sup> E-Cube Materials, Palbok-dong, Deokjin-gu, Jeonju-si, Jeollabuk-do, Republic of Korea

<sup>†</sup> These authors contributed equally.

\* Corresponding authors.

*E-mail addresses:* dykim@kcarbon.or.kr (D. Y. Kim), kskim2676@sejong.ac.kr (K. S. Kim)

**Table S1.** Parameters of the fabricated conducting nanocomposite film.

| Materials                                      | Ratio of materials<br>in PDMS<br>(SWCNTs / r-GO) | Curing conditions |          |
|------------------------------------------------|--------------------------------------------------|-------------------|----------|
|                                                |                                                  | Temp. (°C)        | Time (h) |
| Fabricated<br>nanocomposite<br>conducting film | PDMS-r-GO<br>0 : 2                               | 130               | 2        |

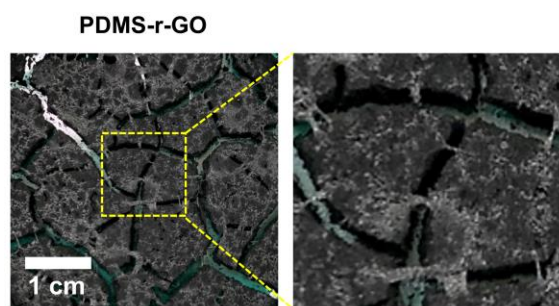

**Fig. S1** Digital photographs of the PDMS-r-GO sample. The nanocomposite film based on PDMS-r-GO (2 wt.%) shows a small broken structure despite the equal fabrication process.

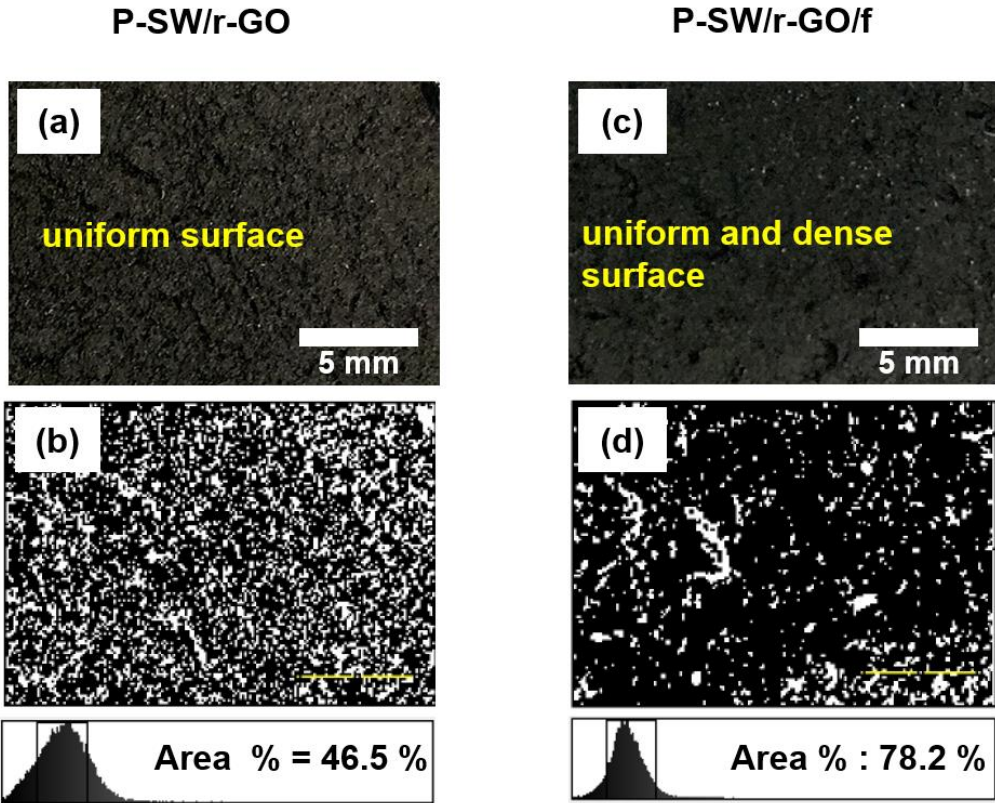

**Fig. S2** Area fraction measurement of darkness on surface of P-SW/r-GO and P-SW/r-GO/f samples using ImageJ analysis. (a) digital photograph and (b) ImageJ of the P-SW/r-GO. (c) digital photograph and (d) ImageJ of the P-SW/r-GO/f. Area fraction values of P-SW/r-GO and P-SW/r-GO/f are indicated 46.5 and 78.2 %, respectively.

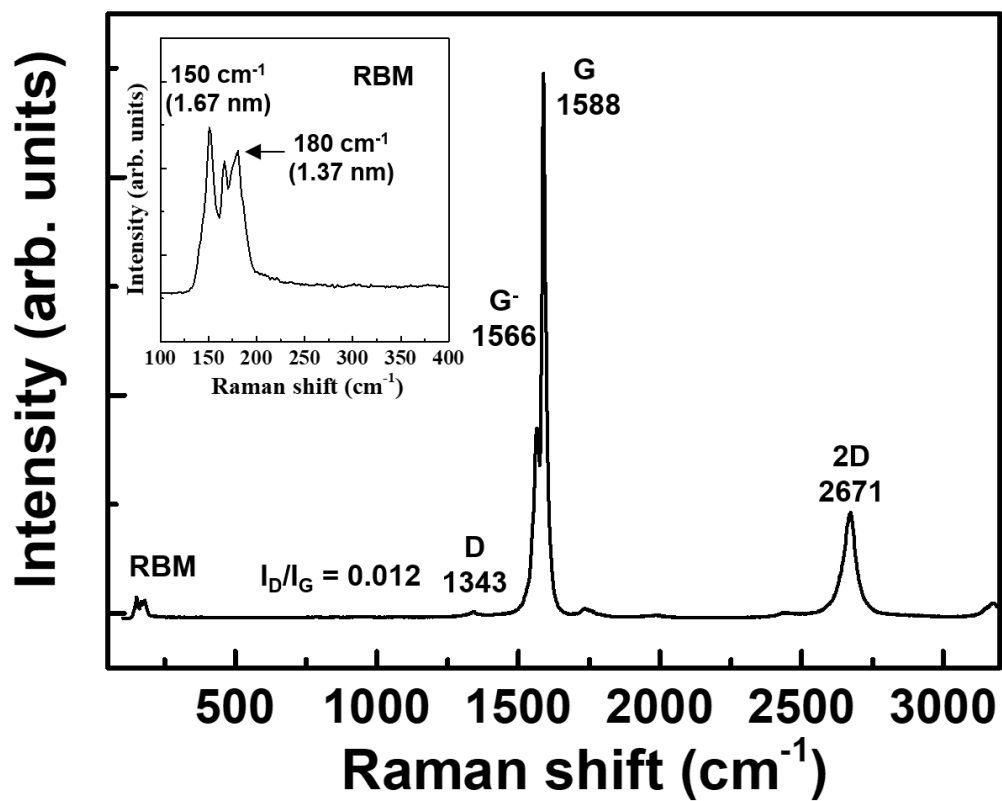

Fig. S3 Raman spectra of the pristine SWCNTs. The inset shows RBM region of the SWCNTs.

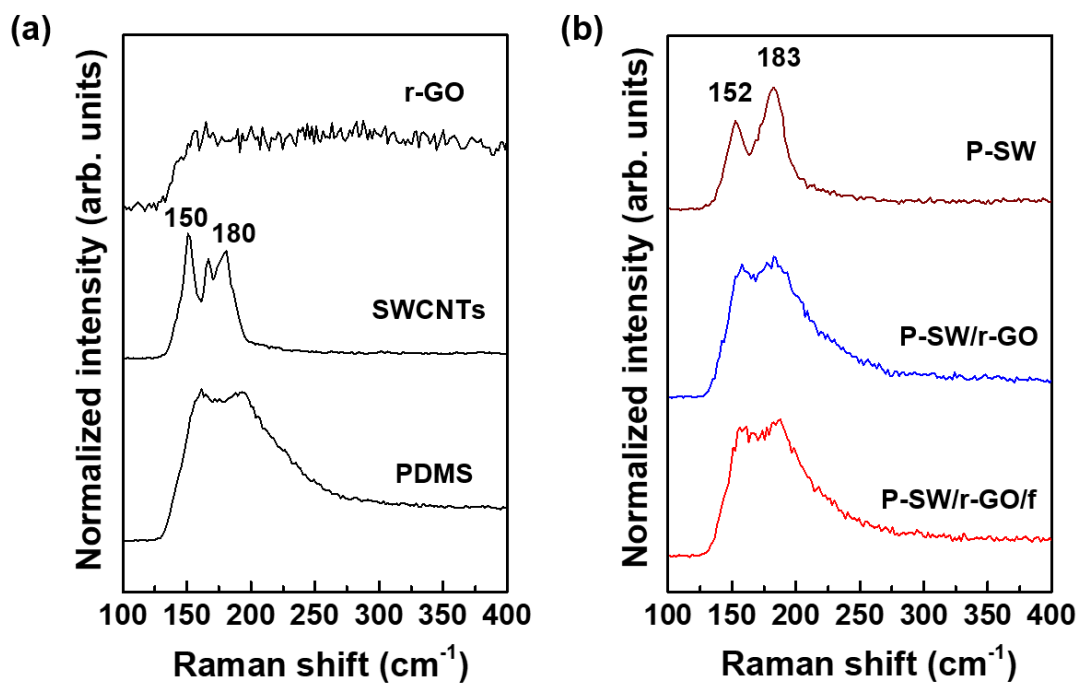

**Fig. S4** Raman spectra in RBM region. (a) PDMS, SWCNTs, and r-GO as raw samples. (b) P-SW, P-SW/r-GO and P-SW/r-GO/f as conducting nanocomposite films.

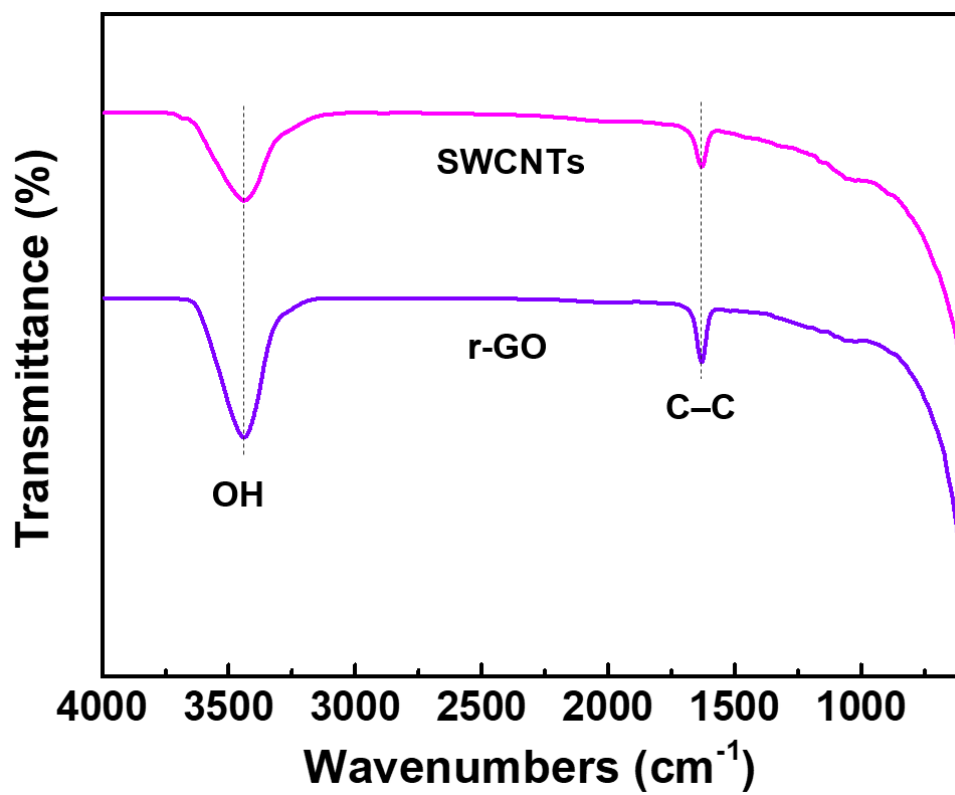

**Fig. S5** FTIR spectra of pristine SWCNTs and r-GO samples.

**Table S2.** XPS elemental analysis results for pristine and nanocomposite samples.

| Materials                                 |             | Element (at.%) |      |      |       |
|-------------------------------------------|-------------|----------------|------|------|-------|
|                                           |             | C              | O    | Si   | Total |
| Pristine samples                          | PDMS        | 49.3           | 24.0 | 26.7 | 100   |
|                                           | SWCNTs      | 96.0           | 2.8  | 1.2  | 100   |
|                                           | r-GO        | 93.1           | 5.1  | 0.6  | 100   |
| Fabricated nanocomposite conducting films | P-SW        | 48.8           | 24.3 | 26.9 | 100   |
|                                           | P-SW/r-GO   | 51.3           | 22.9 | 25.8 | 100   |
|                                           | P-SW/r-GO/f | 46.4           | 26.5 | 27.1 | 100   |

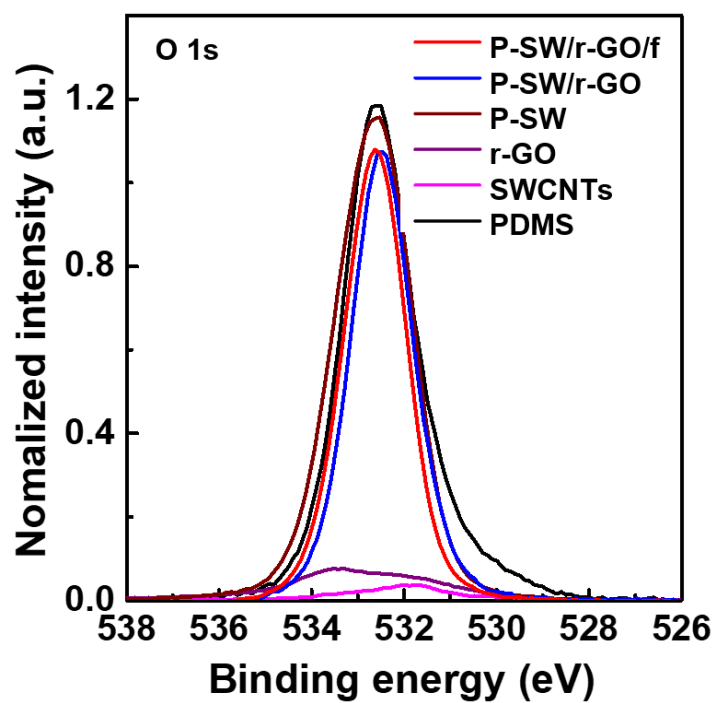

Fig. S6 O 1s XPS spectra of the PDMS, SWCNTs, r-GO, and conducting nanocomposite films.



**Table S3.** FWHMs of C 1s spectra for pristine and nanocomposite samples.

| Samples     | FWHMs<br>form C 1s spectra<br>(eV) |
|-------------|------------------------------------|
| PDMS        | 1.722                              |
| SWCNTs      | 0.954                              |
| r-GO        | 1.181                              |
| P-SW        | 1.720                              |
| P-SW/r-GO   | 1.455                              |
| P-SW/r-GO/f | 1.491                              |

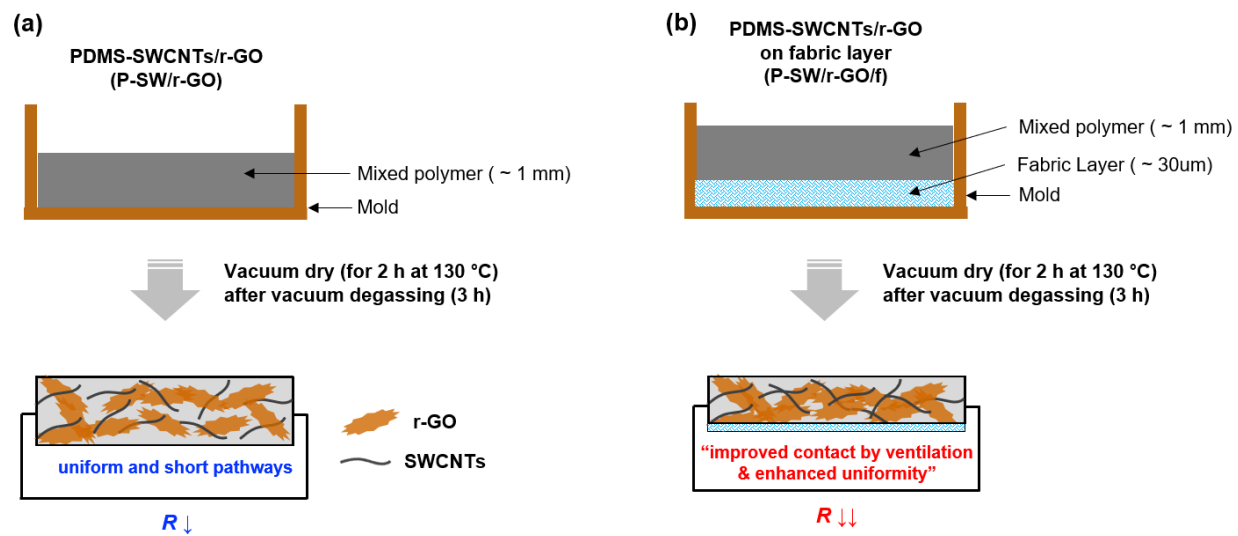

**Fig. S7** Schematic of the fabricated conductive nanocomposite electrode for the (a) P-SW/r-GO and (b) P-SW/r-GO/f samples.

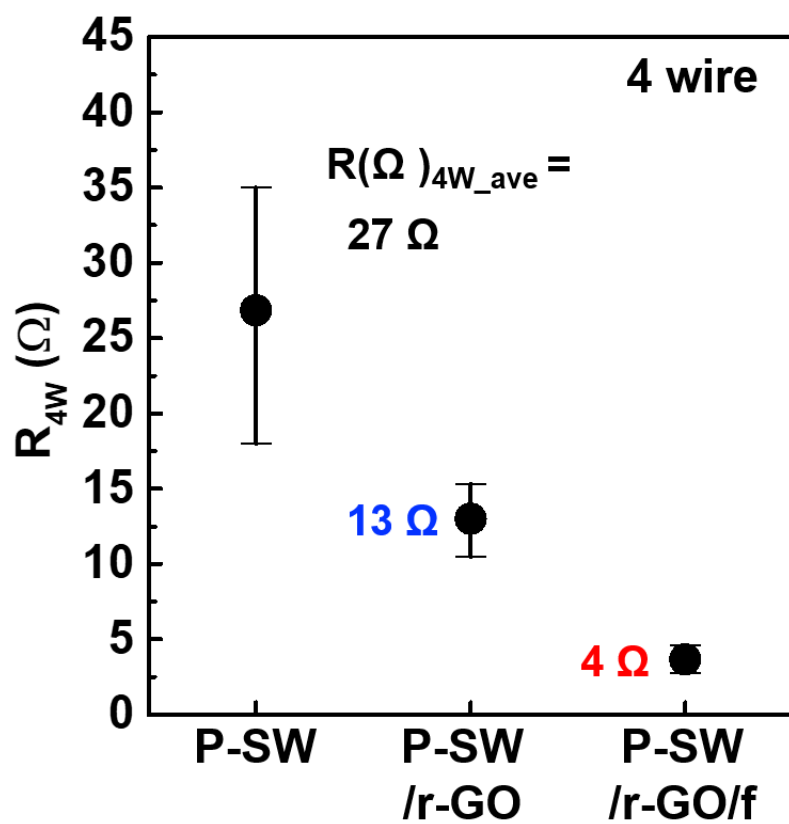

**Fig. S8** Electrical resistances of P-SW, P-SW/r-GO and P-SW/r-GO/f as conducting nanocomposite films by four-probe measurement.

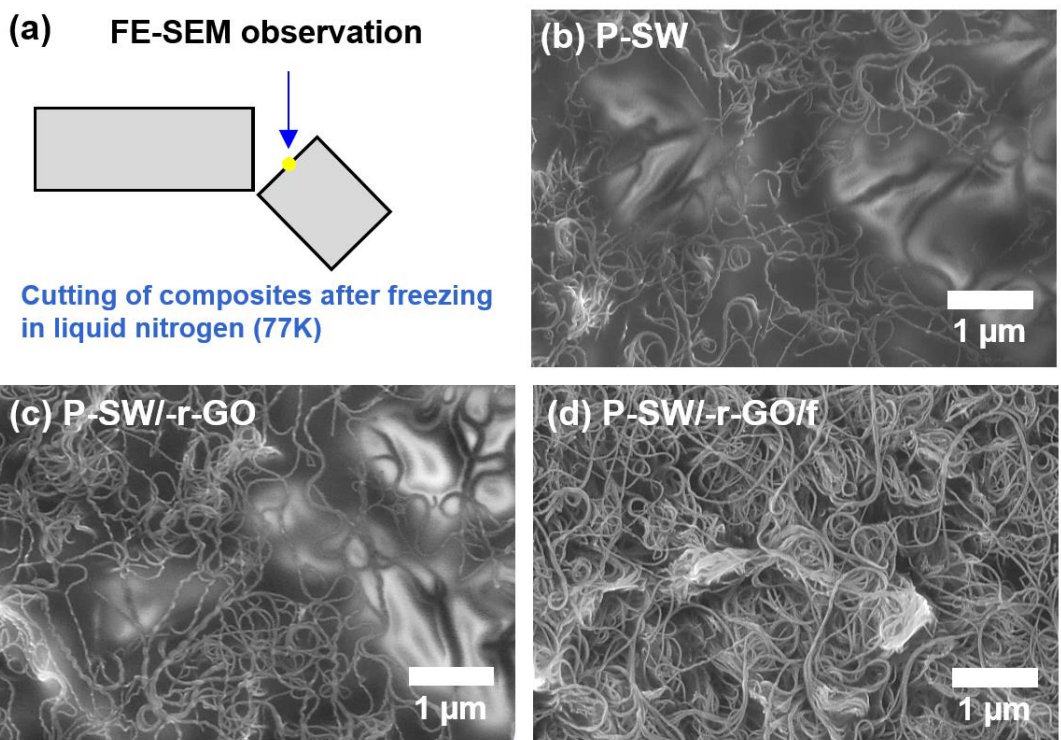

**Fig. S9** Cross-sectional FE-SEM images of the fabricated conducting nanocomposite films for (a) schematic of cutting composites, (b) P-SW, (c) P-SW/r-GO, and (d) P-SW/r-GO/f. Without charging, distinct cross-sectional images of P-SW/r-GO/f were observed via FE-SEM, owing to improved conductivity.

(a)

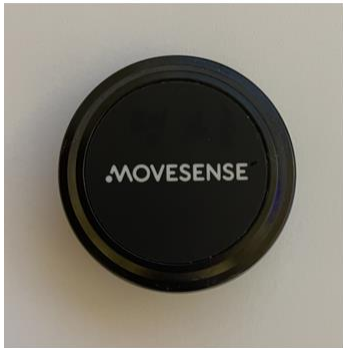

(b)

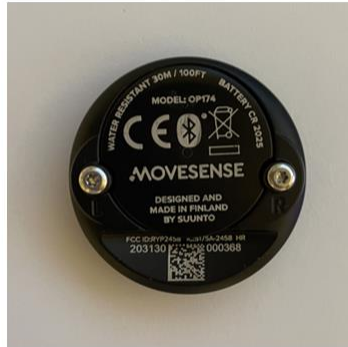

**Fig. S10** Photographic images of the Movesense sensor (MODEL: OP174; diameter 36.6 mm & weight 9.4 g) (a) front and (b) back.

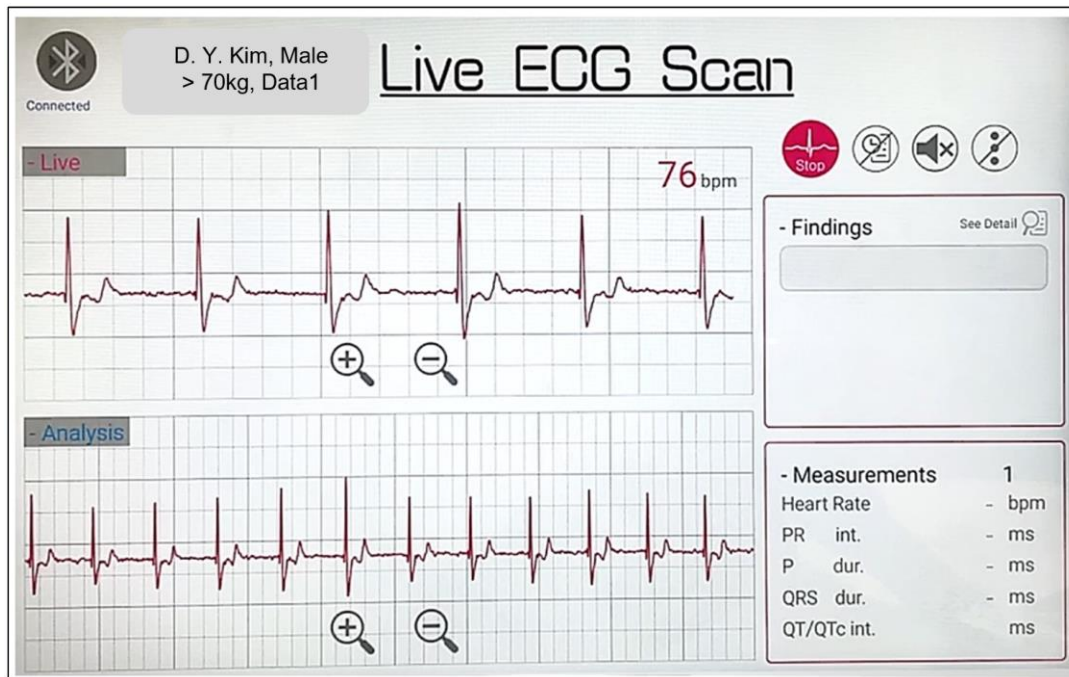

**Fig. S11** Self-developed tablet application for Bluetooth ECG monitoring.

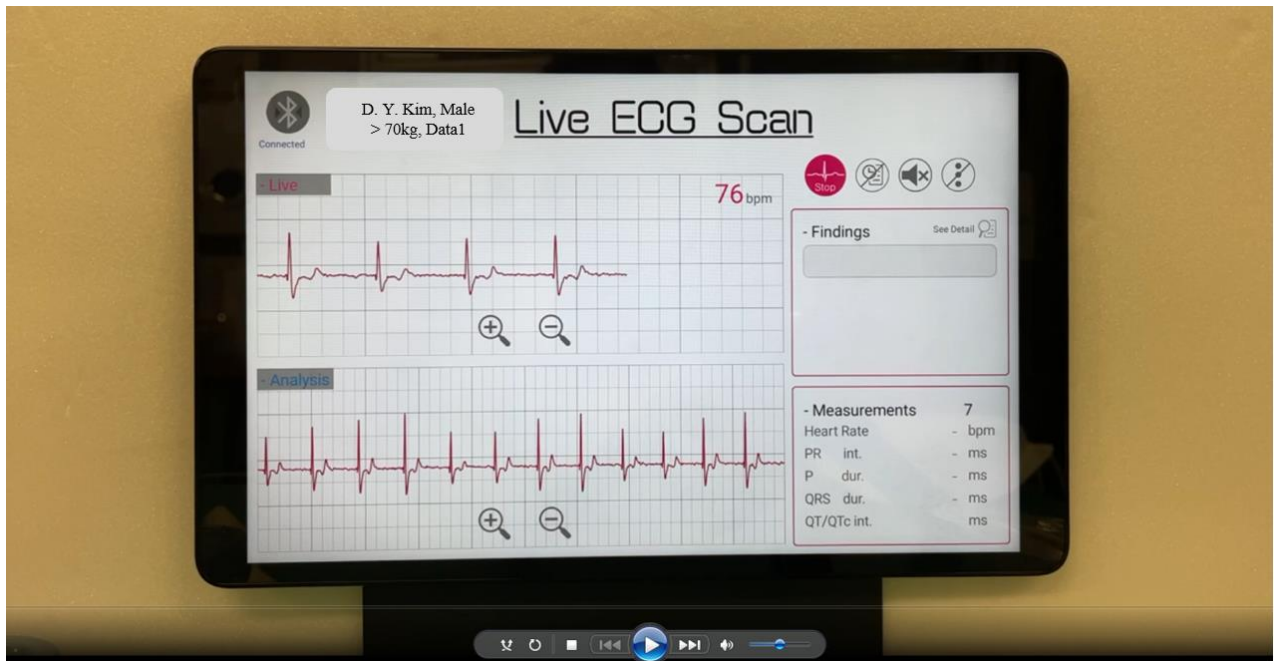

**Movie S1** Real-time measured ECG signal monitoring using self-developed tablet application.

**Table S4.** Comparison of the electrical properties of carbon nanomaterial-based composites.

| Carbon Materials       | Conducting polymer                                        | Material concentration          | Electrical properties                                  | Reference |
|------------------------|-----------------------------------------------------------|---------------------------------|--------------------------------------------------------|-----------|
| SWCNTs                 | SWCNT/hydrogel structure                                  |                                 | 100–350 $\Omega$ /sq.                                  | [1]       |
| MWCNTs                 | Elastic CNT/PDMS composite                                | 1–20 wt.%                       | 2–7000 $\Omega$ /sq.                                   | [2]       |
| Graphene nanoplatelets | Screen printed graphene electrode on textile              | -                               | 104 $\Omega$ /sq.                                      | [3]       |
| Graphene powder        | Electronic tattoos based on silk and graphene             | 40 wt.%                         | 96 $\pm$ 8 $\Omega$ /sq.                               | [4]       |
| Graphene flakes        | Electroconductive polymer spray-coated 3D porous graphene | -                               | 13–32 $\Omega$ /sq.                                    | [5]       |
| SWCNTs /r-GO           | PDMS-based hybrid 1D SWCNTs/2D r-GO                       | SWCNTs (1 wt.%) / r-GO (1 wt.%) | 4 $\Omega$ /sq. (at 4 wire)<br>15 $\Omega$ (at 2 wire) | This work |

[1] E. P. Gilshteyn, S. Lin, V. A. Kondrashov, D. S. Kopylova, A. P. Tsapenko, A. S. Anisimov, A. John Hart, X. Zhao and A. G. Nasibulin, *ACS Appl. Mater. Interfaces*, 2018, **10**, 28069–28075.

[2] J. H. Kim, J. Y. Hwang, H. R. Hwang, H. S. Kim, J. H. Lee, J. W. Seo, U. S. Shin and S. H. Lee, *Sci. Rep.*, 2018, **8**, 1375.

[3] X. Xu, M. Luo, P. He and J. Yang, *J. Phys. D Appl. Phys.* 2020, **53**, 125402.

[4] Q. Wang, S. Ling, X. Liang, H. Wang, H. Lu and Y. Zhang, *Adv. Funct. Mater.* 2019, **29**, 1808695.

[5] M. A. Zahed, P. S. Das, P. Maharjan, S. C. Barman, M. Sharifuzzaman, S. H. Yoon and J. Y. Park, *Carbon*, 2020, **15**, 26–36
